# Supplementary material for: High-performance organic photorefractive materials containing 2-ethylhexyl plasticized poly(triarylamine)
Source: Royal Society of Chemistry journal article supplement (doi:10.1039/d0tc03508d), 2020-01-01
Supplement: d0tc03508d1.pdf [file d0tc03508d1.pdf]

*Supporting Information for*

**High performance organic photorefractive materials  
comprising 2-ethylhexyl plasticized poly(triarylamine)**

Kuo-Lung Wang,<sup>a, b</sup> Jia-Cheng Jiang,<sup>b</sup> Cang-He Jhu,<sup>b</sup> Satoshi Wada,<sup>a</sup>  
Takafumi Sassa<sup>\*a</sup> and Masaki Horie<sup>\*b</sup>

<sup>a</sup> Photonics Control Technology Team, RIKEN Center for Advanced Photonics, 2-1 Hirosawa,  
Wako, Saitama 351-0198, Japan. Email: tsassa@riken.jp

<sup>b</sup> Department of Chemical Engineering, National Tsing-Hua University, 101, Section 2, Kuang-Fu  
Road, Hsinchu, 30013 Taiwan. E-mail: mhorie@mx.nthu.edu.tw

**Contents**

1. Characterization of polymers
2. OFET characteristics
3. Optical characteristics



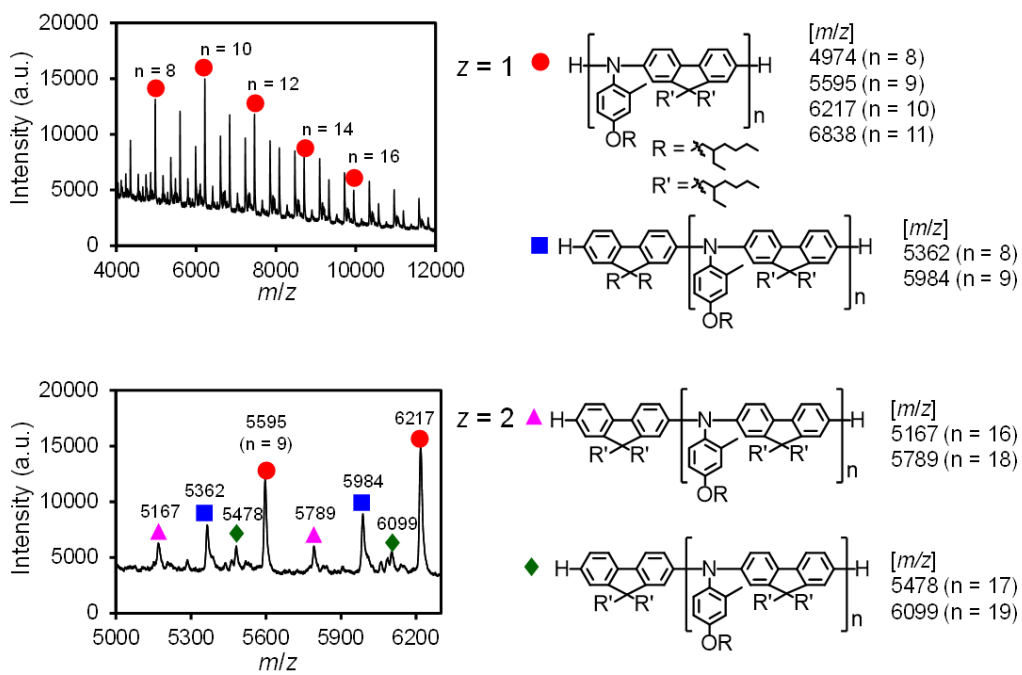

**Fig. S3** MALDI-TOF mass spectrum of **P4**.

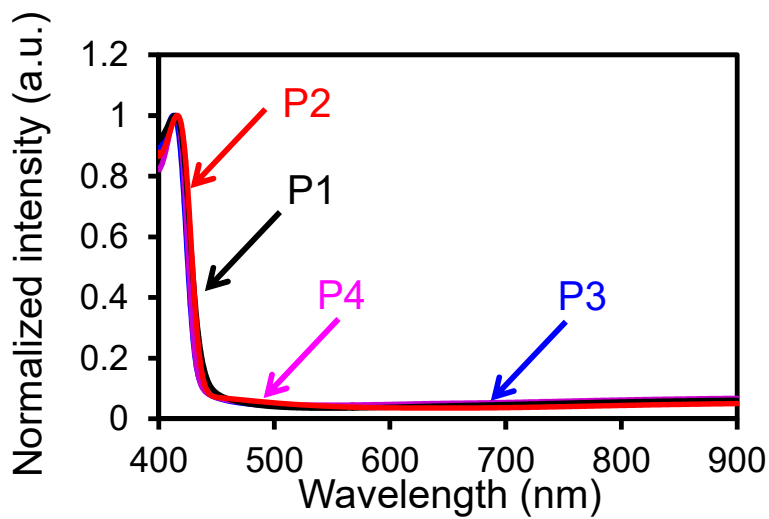

**Fig. S4** UV-Vis spectra of thin film of **P1**, **P2**, **P3** and **P4**.

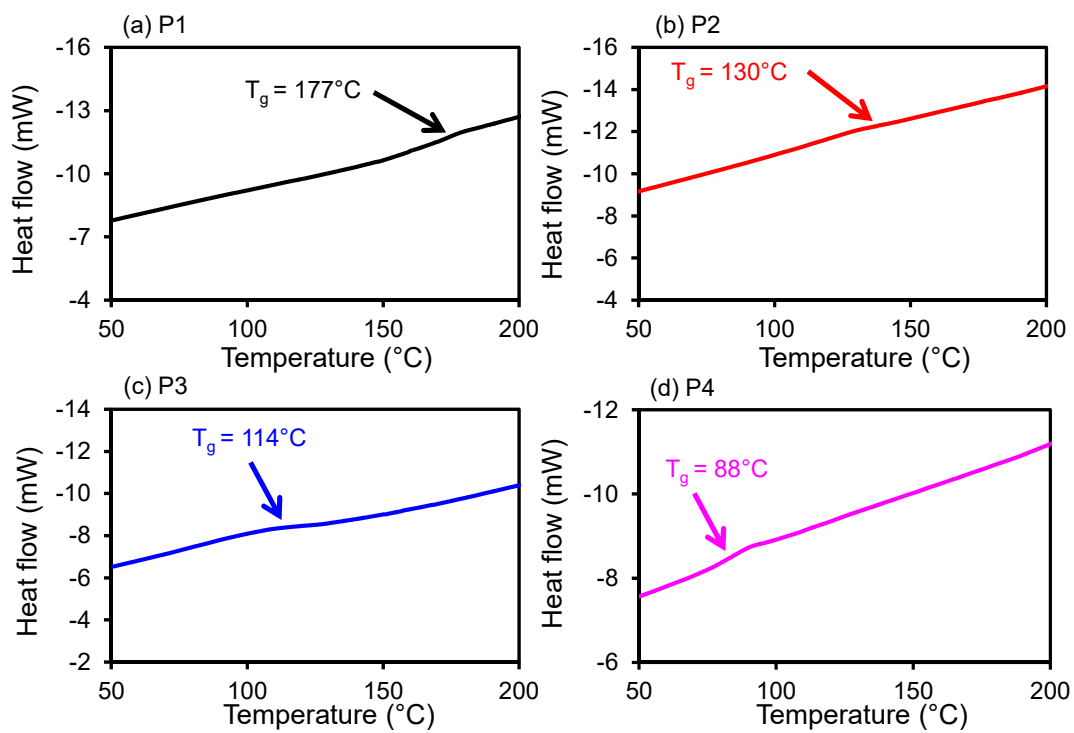

**Fig. S5** DSC curves of **P1**, **P2**, **P3** and **P4**.

## 2. OFET characteristics

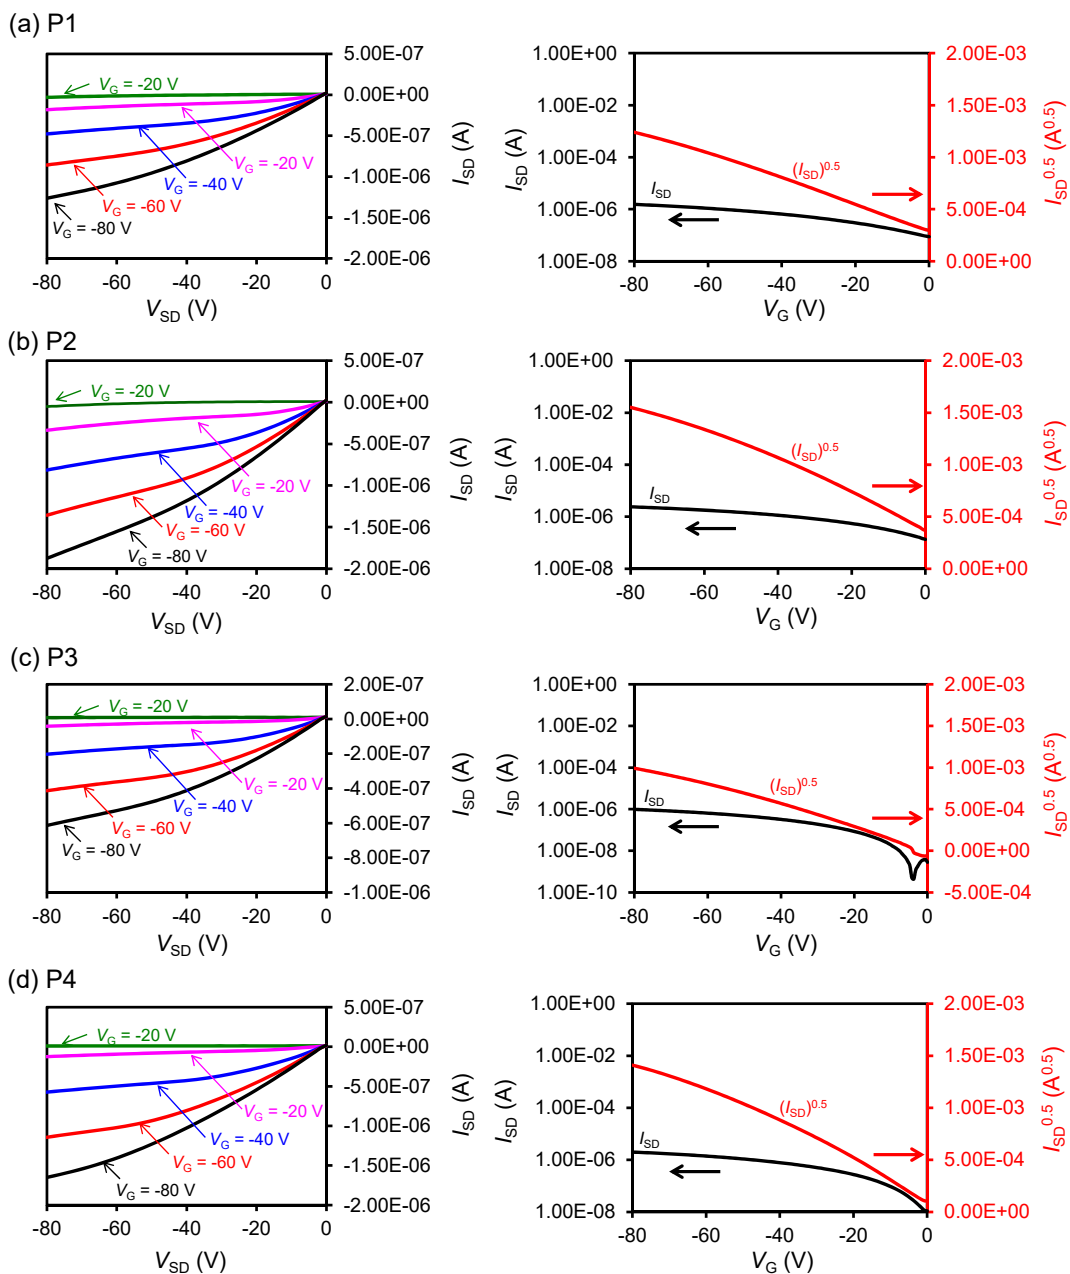

**Fig. S6** Output characteristics of OFET devices.

The hole mobility of polymers was evaluated using Ossilia FACT software with saturated region.

### 3. Optical characteristics

#### 3.1 Observation of optical transparency.

The overall 25 mg mixture of photoconductive polymer (70%) and FDCST (30%) was prepared in a 3-mL sample vial with 325  $\mu$ L chlorobenzene. This solution was then homogeneously mixed by a rotary mixer for exactly 8 hours. After 8 hours of mixing, the polymer solution was dropped onto the ethanol pre-cleaned Teflon tape upon the glass plate. The polymer solution was then gradually dried at 80  $^{\circ}$ C in vacuum for 13 hours to obtain the polymer-FDCST composite film sheet.

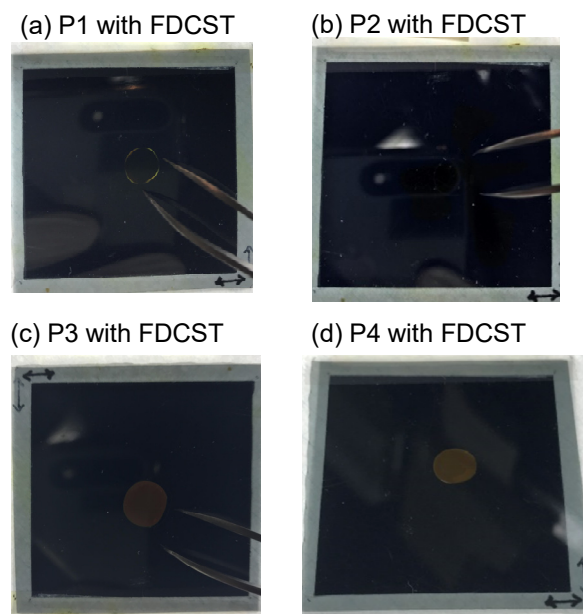

**Fig. S7** Observation of optical transparency.

**Table S1.** Compatibility test of several chromophores.

|           | FDCST<br>(20/30/40 wt%) | 7-DCST<br>(20/30/40 wt%) | AODCST<br>(20/30/40 wt%) |
|-----------|-------------------------|--------------------------|--------------------------|
| <b>P1</b> | $\Delta$ /O/-           | O/O/-                    | O/O/-                    |
| <b>P2</b> | O/O/X                   | X/X/-                    | X/X/-                    |
| <b>P3</b> | X/X/X                   | X/X/X                    | X/X/X                    |
| <b>P4</b> | X/X/X                   | X/X/X                    | X/X/X                    |

O: good optical transparency under crossed polarizer. X: recrystallization after drying the sheet.  $\Delta$ : Poor reproducibility.

(a) Conformation

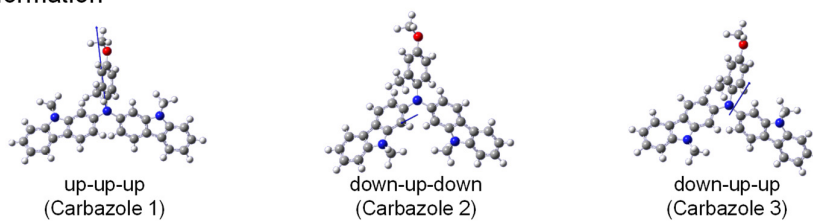

(b) LUMO

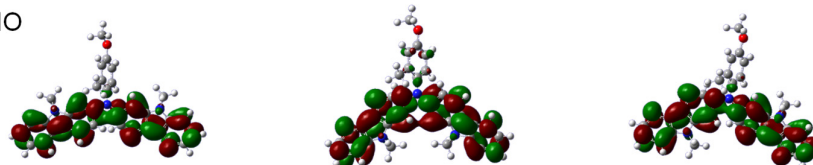

(c) HOMO

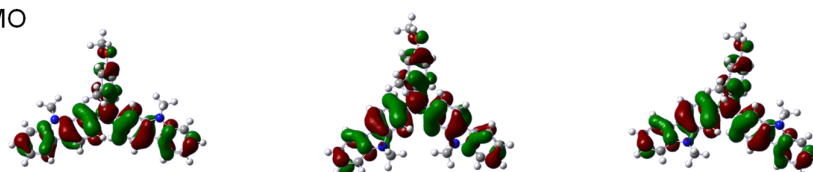

**Fig. S8** Simulated molecular configuration and orbitals of simplified carbazole model.

(a) Conformation

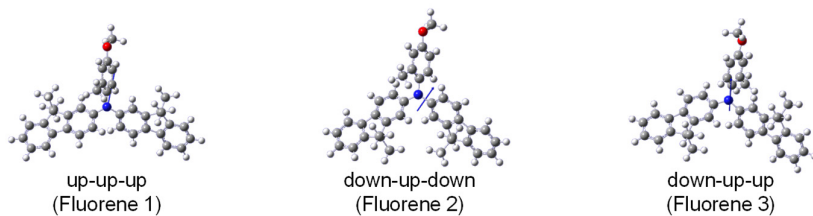

(b) LUMO

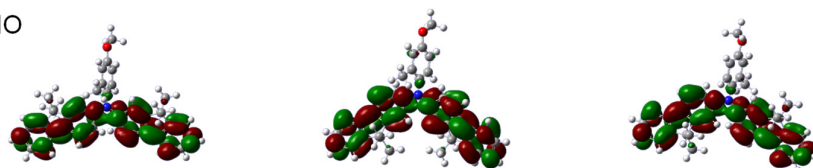

(c) HOMO

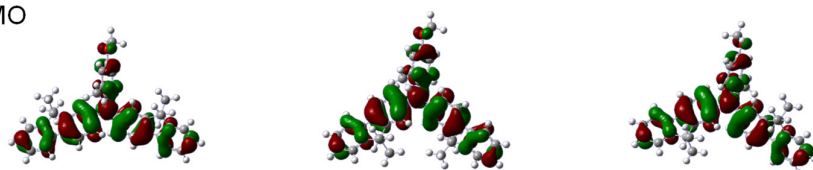

**Fig. S9** Simulated molecular configuration and orbitals of simplified fluorene model.

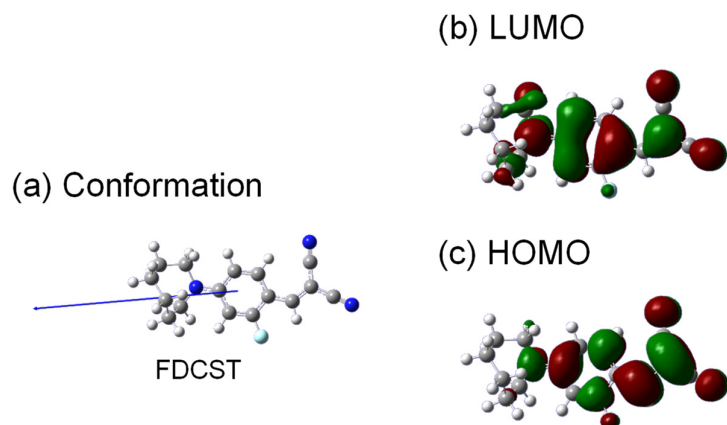

**Fig. S10** Simulated molecular configuration and orbitals of FDCST.

**Table S2** Calculation result of simplified molecular models with different configurations.

| Model       | Conformation  | Dipole<br>(Debye) | HOMO<br>(eV) | Energy<br>(kcal mol <sup>-1</sup> ) |
|-------------|---------------|-------------------|--------------|-------------------------------------|
| Carbazole 1 | up-up-up      | 4.26              | -4.574       | -974273.173                         |
| Carbazole 2 | down-up- down | 1.23              | -4.584       | -974273.001                         |
| Carbazole 3 | down-up-up    | 3.48              | -4.571       | -974273.044                         |
| Fluorene 4  | up-up-up      | 2.26              | -4.648       | -1003476.475                        |
| Fluorene 5  | down-up- down | 1.54              | -4.652       | -1003476.477                        |
| Fluorene 6  | down-up-up    | 2.07              | -4.650       | -1003476.447                        |
| FDCST       | -             | 11.2              | -            | -727.337                            |

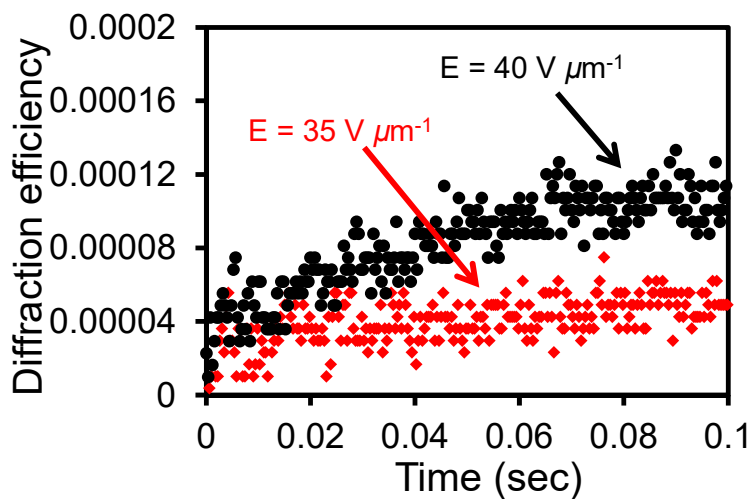

**Fig. S11** PR device performance of composite of P1(69)/FDCST(30)/PCBM(1) with device thickness 45 $\mu$ m.



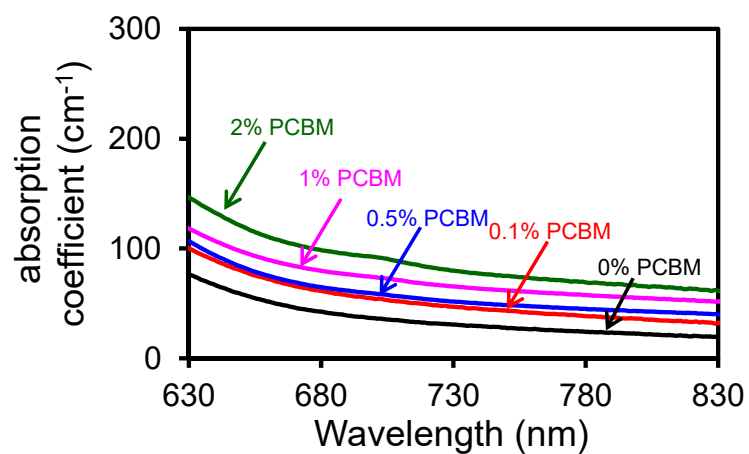

**Fig. S12** UV-Vis spectra of thin film of PR composites in different loading of PCBM with **P2**. The thickness of films was controlled in a range of 25  $\mu\text{m}$  and 35  $\mu\text{m}$ .

**Table S3** Summary of PR performances.

| PR Material <sup>a</sup>                                                            | Laser Power<br>(mW cm <sup>-2</sup> ) | $E_{\text{ext}}$<br>(V $\mu\text{m}^{-1}$ ) | $\alpha_{\text{abs}}$<br>(cm <sup>-1</sup> ) | $\Delta n$ <sup>b</sup><br>( $\times 10^{-3}$ ) | $\tau$<br>(ms) | $S$ <sup>c</sup><br>(cm <sup>3</sup> kJ <sup>-1</sup> ) |
|-------------------------------------------------------------------------------------|---------------------------------------|---------------------------------------------|----------------------------------------------|-------------------------------------------------|----------------|---------------------------------------------------------|
| <b>P2/FDCST/PCBM</b><br>(69/30/1) <sup>d</sup>                                      | 149 <sup>e</sup>                      | 45                                          | 115                                          | 0.53                                            | 1.98           | 15.8                                                    |
| <b>P2/FDCST/PCBM</b><br>(69/30/1) <sup>d</sup>                                      | 642 <sup>e</sup>                      | 45                                          | 115                                          | 0.70                                            | 1.47           | 6.4                                                     |
| PVK/FDCST/EHCz/PCBM<br>(49/30/20/1) <sup>d</sup>                                    | 642 <sup>e</sup>                      | 45                                          | 22                                           | 1.60 <sup>d</sup>                               | 344            | 0.3                                                     |
| DMTPD/7-DCST/PVK/QPbS/C <sub>60</sub><br>(44.8/44.8/9.96/0.223/0.199) <sup>S1</sup> | 19480 <sup>e</sup>                    | 100<br>(50)                                 | 8.04                                         | 2.02 <sup>f</sup><br>(1.66) <sup>f</sup>        | 0.4<br>(158)   | 35.2<br>(0.07)                                          |
| PTPA-g-PEA/DEADCST/TNF<br>(90/9/1) <sup>S2</sup>                                    | 130 <sup>e</sup>                      | 50                                          | 19                                           | 0.30 <sup>f</sup>                               | 8.0            | 15.2                                                    |
| PATPD/7-DCST/ECZ/C60<br>(49.5/35/15/0.5) <sup>S3</sup>                              | 1100 <sup>e</sup>                     | 71                                          | 18                                           | 1.86 <sup>f</sup>                               | 8.0            | 11.8                                                    |
| Poly-TPD/P-IP-DC/BBP/PCBM<br>(54/30/15/1) <sup>S4</sup>                             | 1500 <sup>e</sup>                     | 50                                          | 19                                           | 2.10 <sup>b</sup>                               | 334            | 6.49                                                    |
| PTAA/PDCST/TAA/PCBM<br>(44.5/35/20/0.5) <sup>S5</sup>                               | 1500 <sup>e</sup>                     | 45                                          | 48                                           | 1.00 <sup>f,g</sup>                             | 1.92           | 2.78                                                    |
| Bi <sub>12</sub> SiO <sub>20</sub> <sup>S6</sup>                                    | 1000 <sup>h</sup>                     | 10 kV cm <sup>-1</sup>                      | 1.4 <sup>S7</sup>                            | 0.016                                           | 1.6            | 17.8                                                    |
| Sn <sub>2</sub> P <sub>2</sub> S <sub>6</sub> <sup>S8</sup>                         | 1000 <sup>e</sup>                     | 0                                           | 1.0                                          | 5.00                                            | 2.50           | 20.0                                                    |
| Sn <sub>2</sub> P <sub>2</sub> S <sub>6</sub> <sup>S9</sup>                         | 1000 <sup>i</sup>                     | 0                                           | 0.4                                          | 4.00                                            | 7.00           | 14.3                                                    |

<sup>a</sup> Abbreviation of materials, FDCST: fluorinated dicyanostyrene 4-homo-piperidino benzylidene malononitrile; PCBM: photosensitizer of [6,6]-phenyl C<sub>61</sub> butyric acid methyl ester; PVK: poly(9-vinylcarbazole); EHCz: 9-(2-ethylhexyl)carbazole; DMTPD: *N,N*-Bis(3-methylphenyl)-*N,N'*-bis(phenyl)benzidine; 7-DCST: 2-[[4-(Hexahydro-1*H*-azepin-1-yl)phenyl]methylene]propanedinitrile; QPbS: quantum dots of lead sulfide; C<sub>60</sub>: fullerene; PTAA-g-PEA: poly(triphenylamine)-*graft*-poly(ethyl acrylate); DEADCST: 4-*N,N*-diethylamino-*b,b*-dicyanostyrene; TNF: 2,4,7-trinitro-9-fluorenone; PATPD: poly(acrylic tetraphenyldiaminobiphenol); ECZ: 9-ethylcarbazole; poly-TPD: poly(*N,N*-di-toly-*N,N'*-diphenylbiphenyldiamine); P-IP-DC: 2-{3-[(*E*)-2-(piperidino)-1-ethenyl]-5,5-dimethyl-2-cyclohexenyldiene}-malononitrile; BBP: butyl benzyl phthalate; PDCST: 2-[[4-(1-piperidinyl)phenyl]methylene]propanedinitrile.

<sup>b</sup>  $\Delta n$  was calculated by the equation  $\eta_0 = \sin^2 [\pi d \Delta n / \lambda_{\text{prob}} \cos(\alpha)]$  with using reported values, using reported values in the references for comparison.

<sup>c</sup>  $S = \Delta n / (I_p \alpha_{\text{abs}} \tau)$ , using reported values in the references for comparison.

<sup>d</sup> the result was obtained from this work

<sup>e</sup> the measurement was conducted at pumping laser of wavelength 633 nm

<sup>f</sup>  $\Delta n$  was calculated by the equation  $\eta_0 = \sin^2 [\pi d \Delta n / \lambda_{\text{prob}} \cos(\alpha)]$ . In particular,  $\cos(\alpha)$  was re-estimated from the reported geometry with assuming the refractive index of polymer composite to be 1.7.

<sup>g</sup> the devices thickness was re-estimated to be 75  $\mu\text{m}$ .

<sup>h</sup> the measurement was conducted within pumping laser at wavelength 514 nm

<sup>i</sup> the measurement was conducted within pumping laser at wavelength 780 nm

**Table S4** The energy gap between work function of ITO and HOMO level of the polymers

| Material  | HOMO level<br>(or work function) (eV) | Energy bias from ITO<br>(eV) |
|-----------|---------------------------------------|------------------------------|
| <b>P1</b> | -4.98                                 | 0.18                         |
| <b>P2</b> | -4.85                                 | 0.05                         |
| <b>P3</b> | -5.09                                 | 0.29                         |
| <b>P4</b> | -5.04                                 | 0.24                         |
| ITO       | -4.80                                 | -                            |

## References

- S1. J.-S. Moon, T.E. Stevens, T.C. Monson, D.L. Huber, S.-H. Jin, J.-W. Oh, and J.G. Winiarz, Sub-millisecond response time in a photorefractive composite operating under CW conditions, *Sci. Rep.*, 2016, **6**, 30810.
- S2. Z. Cao, Y. Abe, T. Nagahama, K. Tsuchiya, and K. Ogino, Synthesis and characterization of polytriphenylamine based graft polymers for photorefractive application, *Polymer*, 2013, **54**, 269-276.
- S3. J. Thomas, C. Fuentes-Hernandez, M. Yamamoto, K. Cammack, K. Matsumoto, G.A. Walker, S. Barlow, B. Kippelen, G. Meredith, and S.R. Marder, Bistriarylamine Polymer-Based Composites for Photorefractive Applications, *Adv. Mater.*, 2004, **16**, 2032-2036.
- S4. I.K. Moon, J. Choi, and N. Kim, High-performance photorefractive composite based on non-conjugated main-chain, hole-transporting polymer, *Macromol. Chem. Phys.*, 2013, **214**, 478-485.
- S5. N. Tsutsumi, K. Kinashi, K. Masumura, and K. Kono, Photorefractive performance of poly (triarylamine)-Based polymer composites: An approach from the photoconductive properties, *J. Polym. Sci., Part B: Polym. Phys.*, 2015, **53**, 502-508.
- S6. G.C. Valley and M.B. Klein, Optimal properties of photorefractive materials for optical data processing, *Opt. Eng.*, 1983, **22**, 226704.
- S7. P. Delaye, J. C-Jonathan, G. Pauliat, and G. Roosen, Photorefractive materials: specifications relevant to applications, *Pure Appl. Opt.*, 1996, **5**, 541.
- S8. A. A. Grabar, M. Jazbinsek, A. N. Shumelyuk, Y. M. Vysochanskii, G. Montemezzani, and P. Gunter, in *Photorefractive Materials and Their Applications 2: Materials*, ed. P. Günter and J-P. Huignard, Springer, New York, 1st edn, 2006, ch. 10, pp 327–362.
- S9. Y. Liu, P. Lai, C. Ma, X. Xu, A.A. Grabar, and L.V. Wang, Optical focusing deep inside dynamic scattering media with near-infrared time-reversed ultrasonically encoded (TRUE) light, *Nat. Commun.*, 2015, **6**, 1-9.
